# Supplementary material
Source: Elsevier journal article supplement (https://www.sciencedirect.com/science/article/pii/S238702062030036X)
Supplement: mmc1 [file S238702062030036X:mmc1.docx]

Table S1. The relationship between lgLp-PLA2 levels and risk factors by Multiple linear regression analysis

|  |  | B | Beta | t | p | 95% CI | |
| --- | --- | --- | --- | --- | --- | --- | --- |
| lower | upper |
| Vitamin D insufficiency | Vitamin D | -2.536 | -0.642 | -4.382 | <0.001 | -3.587 | -1.485 |
|  | BMI | 0.865 | 0.373 | 2.262 | 0.021 | 0.120 | 1.235 |
|  | Apo-B | 0.621 | 0.781 | 2.197 | 0.031 | 0.175 | 1.066 |
|  | Apo-B/Apo-A1 | 1.415 | 0.604 | 2.827 | 0.008 | 0.353 | 2.477 |
|  | dyslipidemia | 0.137 | 0.592 | 3.002 | 0.007 | 0.011 | 0.285 |
| Vitamin D sufficiency | Apo-B/Apo-A1 | 0.068 | 0.273 | 2.110 | 0.021 | 0.012 | 0.128 |
